# Supplementary material for: Metabolic Volumetric Parameters in 11C-Choline PET/MR Are Superior PET Imaging Biomarkers for Primary High-Risk Prostate Cancer
Source: Hindawi journal article supplement (doi:10.1155/2018/8945130), 2018-11-05

Table S1. PET imaging parameters and clinical risk features

| Groups                | SUVmax |      |       |        | SUVmean |      |      |        | UVP    |       |        |        | MTV    |      |        |        |
|-----------------------|--------|------|-------|--------|---------|------|------|--------|--------|-------|--------|--------|--------|------|--------|--------|
|                       | Median | min  | max   | p      | Median  | min  | max  | p      | Median | min   | max    | p      | Median | min  | max    | p      |
| PSA $\leq$ 20 (n = 8) | 4.99   | 4.30 | 6.67  | <0.01* | 3.33    | 2.99 | 3.63 | <0.01* | 17.26  | 4.14  | 145.23 | <0.01* | 5.47   | 1.14 | 45.43  | <0.01* |
| PSA > 20 (n = 23)     | 7.13   | 4.37 | 19.43 |        | 4.01    | 3.18 | 8.03 |        | 94.53  | 7.14  | 860.33 |        | 19.35  | 2.17 | 156.70 |        |
| GS $\leq$ 7 (n = 14)  | 6.91   | 4.30 | 19.43 | 0.15   | 3.91    | 2.99 | 8.03 | 0.16   | 35.65  | 7.14  | 860.33 | 0.57   | 9.99   | 2.17 | 107.21 | 0.34   |
| GS 8-10 (n = 17)      | 5.62   | 4.53 | 13.31 |        | 3.54    | 3.12 | 5.30 |        | 67.81  | 4.14  | 721.20 |        | 18.96  | 1.14 | 156.70 |        |
| T2 (n = 4)            | 5.25   | 4.75 | 7.16  | 0.26   | 3.59    | 3.31 | 4.28 | 0.84   | 18.29  | 4.14  | 39.27  | 0.03*  | 4.53   | 1.14 | 11.88  | 0.02*  |
| T3-4 (n = 27)         | 6.46   | 4.30 | 19.43 |        | 3.81    | 2.99 | 8.03 |        | 67.81  | 7.14  | 860.33 |        | 18.96  | 2.17 | 156.70 |        |
| N0 (n = 17)           | 6.36   | 4.30 | 19.43 | 0.44   | 3.61    | 2.99 | 6.67 | 0.60   | 39.27  | 4.14  | 291.22 | 0.19   | 11.88  | 1.14 | 54.96  | 0.13   |
| N1 (n = 14)           | 6.43   | 4.88 | 16.95 |        | 3.84    | 3.12 | 8.03 |        | 100.34 | 10.53 | 860.33 |        | 26.58  | 2.96 | 2.96   |        |
| M0 (n = 15)           | 5.41   | 4.30 | 11.88 | 0.04*  | 3.53    | 2.99 | 5.02 | 0.07   | 26.04  | 4.14  | 202.59 | <0.01* | 7.06   | 1.14 | 44.11  | <0.01* |
| M1 (n = 16)           | 6.49   | 5.08 | 19.43 |        | 3.99    | 3.20 | 8.03 |        | 124.64 | 13.67 | 860.33 |        | 27.15  | 3.54 | 156.70 |        |
| Stage II-III (n = 9)  | 5.62   | 4.30 | 11.88 | 0.22   | 3.53    | 2.99 | 5.02 | 0.20   | 21.12  | 4.14  | 97.16  | 0.01*  | 6.09   | 1.14 | 26.22  | 0.01*  |
| Stage IV (n = 22)     | 6.41   | 4.66 | 19.43 |        | 3.91    | 3.12 | 8.03 |        | 81.17  | 10.53 | 860.33 |        | 22.70  | 2.96 | 156.70 |        |

\*P value < 0.05; PSA, prostate-specific antigen; GS, Gleason score.

Table S2. DCE parameters and clinical risk features

| Groups               | Ktrans <sub>max</sub> |       |        |       | Kep <sub>max</sub> |       |        |       | Kep <sub>kur</sub> |     |        |       | iAUC <sub>kur</sub> |     |      |       |
|----------------------|-----------------------|-------|--------|-------|--------------------|-------|--------|-------|--------------------|-----|--------|-------|---------------------|-----|------|-------|
|                      | Median                | min   | max    | p     | Median             | min   | max    | p     | Median             | min | max    | p     | Median              | min | max  | p     |
| PSA ≤ 20 (n = 8)     | 298.0                 | 159.0 | 1327.0 | 0.81  | 278.5              | 143.0 | 4000.0 | 0.67  | 6.8                | 2.2 | 145.0  | 0.71  | 2.8                 | 2.3 | 3.9  | 0.91  |
| PSA > 20 (n = 23)    | 310.0                 | 110.0 | 3993.0 |       | 227.0              | 66.0  | 4000.0 |       | 3.0                | 1.7 | 1640.8 |       | 2.8                 | 1.6 | 11.3 |       |
| GS ≤ 7 (n = 14)      | 312.0                 | 133.0 | 3993.0 | 0.80  | 192.0              | 66.0  | 4000.0 | 0.27  | 2.6                | 1.7 | 58.7   | 0.03* | 2.4                 | 1.6 | 8.5  | 0.04* |
| GS 8-10 (n = 17)     | 276.0                 | 110.0 | 1327.0 |       | 4000.0             | 78.0  | 4000.0 |       | 8.0                | 2.2 | 1640.8 |       | 3.2                 | 2.2 | 11.3 |       |
| T2 (n = 4)           | 163.0                 | 133.0 | 205.0  | 0.04* | 126.0              | 66.0  | 229.0  | 0.03* | 2.5                | 1.7 | 5.6    | 0.15  | 2.7                 | 2.3 | 3.6  | 0.71  |
| T3-4 (n = 27)        | 320.0                 | 110.0 | 3993.0 |       | 260.0              | 78.0  | 4000.0 |       | 3.5                | 1.9 | 1640.8 |       | 2.8                 | 1.6 | 11.3 |       |
| N0 (n = 17)          | 265.0                 | 110.0 | 3993.0 | 0.63  | 206.0              | 66.0  | 4000.0 | 0.33  | 3.0                | 1.7 | 1640.8 | 0.15  | 2.6                 | 1.9 | 11.3 | 0.49  |
| N1 (n = 14)          | 312.0                 | 141.0 | 1208.0 |       | 330.5              | 141.0 | 4000.0 |       | 8.3                | 1.9 | 145.0  |       | 3.1                 | 1.6 | 8.5  |       |
| M0 (n = 15)          | 225.0                 | 110.0 | 3993.0 | 0.57  | 206.0              | 66.0  | 4000.0 | 0.15  | 2.8                | 1.7 | 58.7   | 0.15  | 2.4                 | 1.9 | 3.6  | 0.05* |
| M1 (n = 16)          | 315.0                 | 141.0 | 1208.0 |       | 330.5              | 99.0  | 4000.0 |       | 8.3                | 1.9 | 1640.8 |       | 3.6                 | 1.6 | 11.3 |       |
| Stage II-III (n = 9) | 164.0                 | 133.0 | 3993.0 | 0.85  | 206.0              | 66.0  | 4000.0 | 0.72  | 3.5                | 1.7 | 58.7   | 0.51  | 2.5                 | 1.9 | 3.3  | 0.03* |
| Stage IV (n = 22)    | 312.0                 | 110.0 | 1208.0 |       | 256.0              | 78.0  | 4000.0 |       | 3.1                | 1.9 | 1640.8 |       | 3.3                 | 1.6 | 11.3 |       |

\*P value < 0.05. Ktrans<sub>kur</sub> and iAUC<sub>max</sub> were omitted in Table S2 because of a lack of significant results in all comparisons. PSA, prostate-specific antigen; GS, Gleason score.

Table S3. ADC parameters and clinical risk features

| Groups               | ADC <sub>min</sub> |       |       |        | ADC <sub>mean</sub> |       |        |       | ADC <sub>kur</sub> |     |     |       |
|----------------------|--------------------|-------|-------|--------|---------------------|-------|--------|-------|--------------------|-----|-----|-------|
|                      | Median             | min   | max   | p      | Median              | min   | max    | p     | Median             | min | max | p     |
| PSA ≤ 20 (n = 8)     | 74.0               | 5.0   | 283.0 | 0.23   | 1060.7              | 943.4 | 1357.4 | 0.11  | 3.7                | 2.4 | 4.7 | 0.98  |
| PSA > 20 (n = 23)    | 17.0               | 1.0   | 485.0 |        | 980.5               | 674.7 | 1247.9 |       | 3.1                | 2.4 | 5.7 |       |
| GS ≤ 7 (n = 14)      | 67.0               | 2.0   | 485.0 | 0.06   | 1070.3              | 910.3 | 1357.4 | 0.02* | 2.8                | 2.4 | 4.7 | 0.11  |
| GS 8-10 (n = 17)     | 7.0                | 1.0   | 269.0 |        | 958.2               | 674.7 | 1123.0 |       | 3.7                | 2.4 | 5.7 |       |
| T2 (n = 4)           | 251.0              | 145.0 | 485.0 | 0.01*  | 947.7               | 921.2 | 1247.9 | 0.76  | 2.5                | 2.4 | 3.8 | 0.04* |
| T3-4 (n = 27)        | 11.0               | 1.0   | 462.0 |        | 1036.3              | 674.7 | 1357.4 |       | 3.6                | 2.4 | 5.7 |       |
| N0 (n = 17)          | 28.0               | 2.0   | 485.0 | 0.12   | 1051.4              | 674.7 | 1357.4 | 0.57  | 2.8                | 2.4 | 4.7 | 0.22  |
| N1 (n = 14)          | 8.0                | 1.0   | 233.0 |        | 992.8               | 859.4 | 1131.7 |       | 3.7                | 2.4 | 5.7 |       |
| M0 (n = 15)          | 145.0              | 2.0   | 485.0 | 0.03*  | 1002.8              | 674.7 | 1357.4 | 0.38  | 3.1                | 2.4 | 4.7 | 0.57  |
| M1 (n = 16)          | 6.0                | 1.0   | 137.0 |        | 1009.5              | 874.3 | 1118.7 |       | 3.4                | 2.4 | 5.7 |       |
| Stage II-III (n = 9) | 269.0              | 9.0   | 485.0 | <0.01* | 1117.9              | 921.2 | 1357.4 | 0.04* | 2.7                | 2.4 | 4.7 | 0.22  |
| Stage IV (n = 22)    | 6.5                | 1.0   | 233.0 |        | 973.9               | 674.7 | 1131.7 |       | 3.6                | 2.4 | 5.7 |       |

\*P value < 0.05. PSA, prostate-specific antigen; GS, Gleason score.

(a)

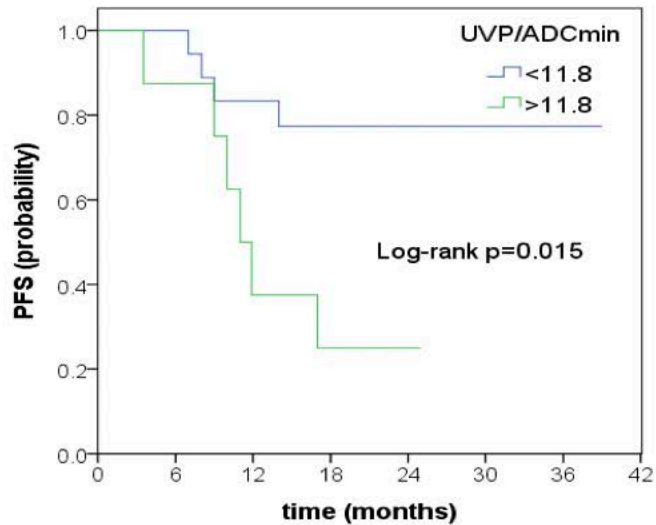

(b)

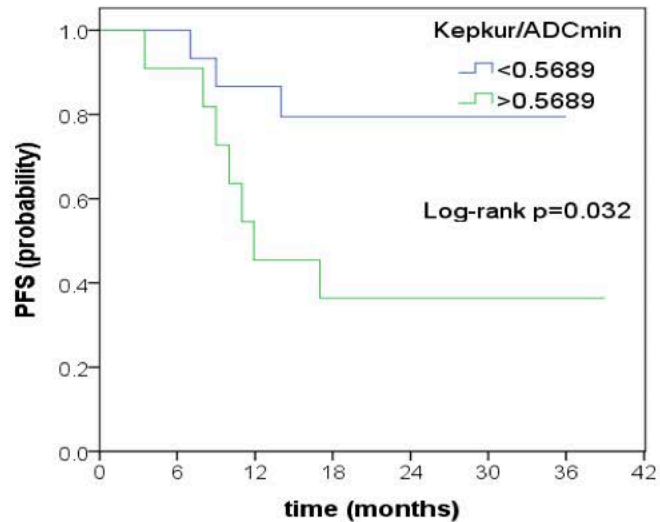

Supplement: f1 [file 8945130.f1.pdf]
